# Supplementary material
Source: PubMed Central journal article supplement (PMC10664751)
Supplement: NIHMS1596221-supplement-1.pdf [file NIHMS1596221-supplement-1.pdf]

**SOCIETY FOR INVESTIGATIVE DERMATOLOGY**  
(hereinafter the "Journal")  
**LICENSE AGREEMENT**

**PLEASE PROVIDE US WITH THE FOLLOWING INFORMATION, REVIEW OUR POLICIES AND THE LICENSE AGREEMENT, AND INDICATE YOUR ACCEPTANCE OF THE TERMS**

|                                 |                                             |
|---------------------------------|---------------------------------------------|
| Article entitled:               |                                             |
| Corresponding author:           |                                             |
| To be published in the journal: | <b>Journal of Investigative Dermatology</b> |
| Manuscript number (if known):   |                                             |

**YOUR STATUS (PLEASE MARK ALL THAT APPLY)**

**I am the sole author of the manuscript**

Please indicate which of the below applies to you:

- I am a UK Government employee electing to license copyright  
 I am a UK, Canadian or Australian Government employee and Crown Copyright is claimed  
 I am a US Government employee and the Article is public domain and therefore the 'License of publishing rights' clause does not apply  
 I am a contractor of the US Government under contract number: \_\_\_\_\_  
 None of the above

**I am one author signing on behalf of all co-authors of the manuscript**

Please indicate which of the below applies to you:

- We are all US Government employees and the Article is public domain and therefore the 'License of publishing rights' clause does not apply  
 I am a US Government employee but some of my co-authors are not  
 I am not a US Government employee but some of my co-authors are  
 The work was performed by contractors of the US Government under contract number: \_\_\_\_\_  
 We are all UK Government employees electing to license copyright  
 We are all UK, Canadian or Australian Government employees and Crown Copyright is claimed  
 I am claiming Crown Copyright but some of my co-authors are not employees of the UK, Canadian or Australian Government  
 I am not claiming Crown Copyright but some of my co-authors are employees of the UK, Canadian or Australian Government  
 None of the above

**I am signing as an authorized representative and on behalf of my employer**

**Name and job title of licensee if different from corresponding author:** \_\_\_\_\_

Please indicate which of the below applies to you:

- The Article is authored by US Government employees and is public domain and therefore the 'License of publishing rights' clause does not apply  
 The work was performed by contractors of the US Government under contract number: \_\_\_\_\_  
 The Article is authored by UK, Canadian or Australian Government employees and Crown Copyright is claimed  
 My employer is the owner of the copyright in the Article  
 Organization (please use the full name of the organization as it should appear in the copyright notice: \_\_\_\_\_  
 None of the above

**DATA PROTECTION & PRIVACY**

I understand that staff of The Society for Investigative Dermatology and the publisher and its affiliated companies worldwide will be contacting me concerning the publishing of the Article and occasionally for marketing purposes (unless, with respect to such marketing, I tick the box below).

- I do not wish to receive news, promotions and special offers about products and services of The Society for Investigative Dermatology and the publisher and its affiliated companies worldwide.

Please tick **one or more** of the above boxes (as appropriate), review the License Agreement, and then sign and date the License Agreement in black ink.

Signed: \_\_\_\_\_ Name printed: \_\_\_\_\_

Title and Company (if employer representative): \_\_\_\_\_

Date: \_\_\_\_\_

Please sign this License Agreement and return the completed and signed original of this form and upload it with your manuscript files. Or, e-mail a scanned copy of the signed original to JIDOffice@sidnet.org, and retain a copy for your files.

## THE LICENSE AGREEMENT

### License of publishing rights

I hereby grant to the Journal an exclusive publishing and distribution license in the manuscript identified above and any tables, illustrations or other material submitted for publication as part of the manuscript (the “Article”) in all forms and media (whether now known or later developed), throughout the world, in all languages, for the full term of copyright, effective when the Article is accepted for publication. This license includes the right to enforce the rights granted by this license against third parties and to sublicense such rights.

### Supplemental Materials

With respect to Supplemental Materials that I wish to make accessible through a link in the Article or on a site or through a service of the Journal, the Journal shall be entitled to publish, post, reformat, index, archive, make available and link to such Supplemental Materials on a non-exclusive basis in all forms and media (whether now known or later developed), and to permit others to do so. “Supplemental Materials” shall mean additional materials that are not an intrinsic part of the Article, including but not limited to experimental data, e-components, encodings and software, and enhanced graphical, illustrative, video and audio material.

### Retention of Rights for Scholarly Purposes (see ‘Definitions’ clause below)

I understand that I retain the copyright in the Article and that no rights in patents, trademarks or other intellectual property rights are transferred to the Journal. Further and notwithstanding the exclusive publishing and distribution license granted above, I understand that I retain or am hereby granted (without the need to obtain further permission) the Retained Rights (see description below and definitions).

The Retained Rights include:

- the right to use the Preprint, Accepted Manuscript and the Published Journal Article for Personal Use, Internal Institutional Use and for Scholarly Sharing.

In the case of the Accepted Manuscript and the Published Journal Article the Retained Rights exclude Commercial Use (unless expressly agreed in writing by the Journal), other than use by the author in a subsequent compilation of the author’s works or to extend the Article to book length form or re-use by the author of portions or excerpts in other works (with full acknowledgment of the original publication of the Article).

### Reversion of rights

Articles may sometimes be accepted for publication but later rejected in the publication process, even in some cases after public posting in “Articles in Press” form, in which case all rights will revert to the author (see <http://www.elsevier.com/locate/withdrawalpolicy>).

### Revisions and addenda

I understand that no revisions, additional terms or addenda to this License Agreement can be accepted without the Journal’s express written consent. I understand that this License Agreement supersedes any previous agreements I have entered into with the Journal in relation to the Article from the date hereof.

### Copyright Notice

The publisher shall publish and distribute the Article with the appropriate copyright notice.

### Author Representations/Ethics and Disclosure

I affirm the Author Representations noted below, and confirm that I have reviewed and complied with the relevant Instructions to Authors, Ethics in Publishing policy, and Conflicts of Interest disclosure. Please note that some journals may require that all co-authors sign and submit Conflicts of Interest disclosure forms. I am also aware of the publisher’s policies with respect to retractions and withdrawal (<http://www.elsevier.com/locate/withdrawalpolicy>).

For further information see the publishing ethics page at <http://www.elsevier.com/publishingethics> and the journal home page.

### *Author Representations*

- The Article I have submitted to the journal for review is original, has been written by the stated authors and has not been published elsewhere.
- The Article was not submitted for review to another journal while under review by this journal and will not be submitted to any other journal.
- The Article and the Supplemental Materials contain no libellous or other unlawful statements and do not contain any materials that violate any personal or proprietary rights of any other person or entity.
- I have obtained written permission from copyright owners for any excerpts from copyrighted works that are included and have credited the sources in the Article or the Supplemental Materials. Copies of all such permissions are attached to this license.
- Except as expressly set out in this License Agreement, the Article is not subject to any prior rights or licenses and, if my or any of my co-authors’ institution has a policy that might restrict my ability to grant exclusive rights under this License Agreement, a written waiver of that policy has been obtained.
- If I am using any personal details or images of patients, research subjects or other individuals, I have obtained all consents required by applicable law and complied with the publisher’s policies relating to the use of such images or personal information. See <http://www.elsevier.com/patientphotographs> for further information.
- Any software contained in the Supplemental Materials is free from viruses, contaminants or worms.
- If the Article or any of the Supplemental Materials were prepared jointly with other authors, I have informed the co-author(s) of the terms of this License Agreement and that I am signing on their behalf as their agent, and I am authorized to do so.

For information on the publisher’s copyright and access policies, please see <http://www.elsevier.com/copyright>.

## DEFINITIONS

### Accepted Manuscript

The manuscript of an Article that has been accepted for publication and which typically includes author-incorporated changes suggested during submission, peer review, and editor-author communications. The Accepted Manuscript should not be added to or enhanced in any way to appear more like, or to substitute for, the Published Journal Article. The Accepted Manuscript should include a link to the formal publication through the relevant DOI and should bear a Creative Commons CC BY NC ND license.

### Commercial Use

The use or posting of Articles:

- for commercial gain for example by associating advertising with the full-text of the Article, by providing hosting services to other repositories or to other organisations, or charging fees for document delivery or access
- to substitute for the services provided directly by the publisher for example article aggregation, systematic distribution via e-mail lists or share buttons, posting, indexing or linking by commercial companies for use by customers of such companies (e.g. pharmaceutical companies and physician-prescribers).

### Internal Institutional Use

Use by the author's institution for classroom teaching at the institution and for internal training purposes (including distribution of copies, paper or electronic, and use in coursepacks and courseware programs, but not in MOOCs - Massive Open Online Courses) and inclusion of the Article in applications for grant funding. For authors employed by companies, the use by that company for internal training purposes.

### Personal Use

Use by an author in the author's classroom teaching (including distribution of copies, paper or electronic), distribution of copies (including through e-mail) to known research colleagues for their personal use, use in a subsequent compilation of the author's works, inclusion in a thesis or dissertation, preparation of other derivative works such as extending the Article to book-length form, or otherwise using or re-using portions or excerpts in other works (with full acknowledgment of the original publication of the Article).

### Preprint

Author's own write-up of research results and analysis that has not been peer reviewed, nor had any other value added to it by a publisher (such as formatting, copyediting, technical enhancements and the like). Preprints should not be added to or enhanced in any way in order to appear more like, or to substitute for, the Published Journal Article.

### Published Journal Article

The definitive final record of published research that appears or will appear in the journal and embodies all value-adding publisher activities including peer-review co-ordination, copy-editing, formatting, (if relevant) pagination, and online enrichment.

### Scholarly Sharing

#### *Preprints:*

Sharing of Preprints by an author on any website or repository at any time. When the Article is accepted, the author is encouraged to include a link to the formal publication through the relevant DOI. The author can also update the preprint on arXiv or RePEc with the Accepted Manuscript.

#### *Accepted Manuscripts:*

- (i) Immediately on acceptance: sharing of the Accepted Manuscript by an author:
  - via the author's non-commercial personal homepage or blog
  - via the author's research institute or institutional repository for Internal Institutional Use or as part of an invitation-only research collaboration work-group
  - directly by providing copies to the author's students or to research collaborators for their personal use
  - for private scholarly sharing as part of an invitation-only work group on commercial sites with which the publisher has a hosting agreement
- (ii) After the embargo period: an author may share the Accepted Manuscript via non-commercial hosting platforms (such as the author's institutional repository) and via commercial sites with which the publisher has a hosting agreement.

To check the embargo period for the journal, go to [http://www.elsevier.com/data/assets/pdf\\_file/0018/121293/external-embargo-list.pdf](http://www.elsevier.com/data/assets/pdf_file/0018/121293/external-embargo-list.pdf)

The publisher has agreements with certain funding agencies that may permit shorter embargo periods and/or different sharing guidelines. To learn more about the publisher's policies and agreements with such agencies or institutions go to <http://www.elsevier.com/fundingbodyagreements>.

#### *Published Journal Article:*

The author may share a link to the formal publication through the relevant DOI. Additionally theses and dissertations which contain embedded Published Journal Articles as part of the formal submission may be hosted publicly by the awarding institution with a link to the formal publication through the relevant DOI. Any other sharing of Published Journal Articles is by agreement with the publisher only.
